# Supplementary material
Source: HighWire-hosted journal article supplement (https://rmdopen.bmj.com/content/4/2/e000723)

**Supplementary Figure 1. FUTURE 1 Extension Study Design**


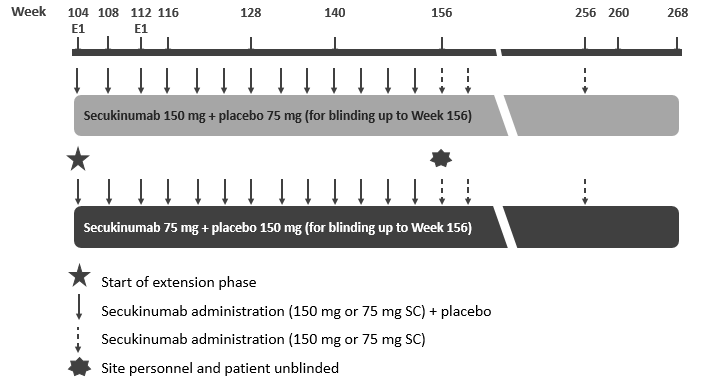

Supplement: inline-supplementary-material-3 [file inline-supplementary-material-3.docx]
